## CORRESPONDENCE

Anesthesiology  
2000; 92:1203  
© 2000 American Society of Anesthesiologists, Inc.  
Lippincott Williams & Wilkins, Inc.

*In Reply:*—We regret that Drs. Black and Mackersie clearly have misunderstood the most important result of our study. Our primary goal was to find the effective dose of rectal acetaminophen in children during a day-case surgical setting. When we designed the study groups, we seriously thought to include a small-dose group (10 mg/kg) instead of a placebo group; however, our clinical impression has been that this small dose has no effect on pain. Therefore, a pure placebo group was included in the study. Our anesthesia method with sevoflurane in nitrous oxide and oxygen provides excellent cardiovascular, endocrine, and ventilatory stability for superficial surgery. Pain was assessed and treated postoperatively as effectively as possible. Therefore, we did not see ethical compromises in our study design. The design enabled us to find an effective dose of acetaminophen for 50% of subjects.

Pain treatment of pediatric patients still is often guided by traditions or clinical impressions. Most likely, a balanced pain treatment approach provides better pain control than a single drug. However, to provide effective components for the balanced technique, we have to find the dose-response relation of these single components, and the possible synergism between the components. We recommended that a single dose of rectal acetaminophen should be at least 40 mg/kg and that a daily dose should be limited to that published previously.<sup>1,2</sup> We do not recommend increasing the daily dose of acetaminophen, but suggest that a high single dose produces favorable clinical response beyond its expected pharmacokinetic profile. Our young patients

would definitely benefit if similar study designs are carried out using other nonsteroidal antiinflammatory drugs and combinations of pain killers in children.

**Reijo Korpela, M.D.**  
reijo.korpela@huch.fi  
**Pekka Korvenoja, M.D.**  
**Olli Meretoja, M.D., Ph.D.**  
Department of Anesthesia  
Hospital for Children and Adolescents  
University of Helsinki  
Helsinki, Finland

## References

1. Gaukroger PB: Pediatric analgesia: Which drugs? Which dose? *Drugs* 1991; 41:52-9
2. Morton NS, Arana A: Paracetamol induced fulminant hepatic failure in a child after 5 days of therapeutic doses. *Pediatr Anaesth* 1999; 9:463-5

(Accepted for publication December 8, 1999.)

Anesthesiology  
2000; 92:1203-4  
© 2000 American Society of Anesthesiologists, Inc.  
Lippincott Williams & Wilkins, Inc.

## What Anesthesiologists Should Know About What Neurologists Should Know About Declaring Brain Death

*To the Editor:*—Dr. Van Norman's review article concerning medical, legal, and ethical aspects of declaring brain death is at times perfunctory and unconvincing.<sup>1</sup> A general theme is that anesthesiologists should watch over other physicians's declarations of brain death, and one of the concrete demands is summarized as follows: "Anesthesiologists have an important responsibility in the process of assuring that some living patients are not sacrificed to benefit others."

Three cases that involve blatant misinterpretation and errors by "physicians" set the stage for a nimbly crafted report that discusses a variety of views surrounding the diagnosis of brain death. In addition to these three cases, which in their journalistic description unfortunately contain little detail about the neurologic assessment of these patients, Dr. Van Norman claims that in one study, two thirds of physicians were unable to correctly identify or apply the whole-brain criteria for the determination of brain death.<sup>2</sup> This study, which surveyed health professionals, indeed found major differences in the assessment of brain death and vegetative state among respondents

when two fictitious cases were presented. The study included intensive care nurses, medical residents, attending anesthesiologists, operating room nurses, and intensive care unit physicians; however, no neurologists and only 16 attending neurosurgeons or neurosurgeons in training were included in the survey.

It is encouraging to read that Dr. Van Norman believes that, in the determination of brain death, at least one of the attending physicians should be a neurologist or a neurosurgeon. The declaration of brain death necessitates academic precision, but who is qualified to determine brain death is a matter of discussion. One may argue that the determination should involve critical care neurologists and neurosurgeons, and perhaps one or two dedicated neurologists or neurosurgeons on call.

Although the article does not contain gross factual errors, there are some confusing recommendations when the confirmatory tests are discussed. The article lacks a comprehensive discussion of the validity of confirmatory tests. In addition, the report fails to address the inter-

## CORRESPONDENCE

pretation of clinical observations that may be compatible with brain death (but suggest otherwise) and critical evaluation of the apnea test procedure. These topics can be found in a practice parameter developed by the American Academy of Neurology and approved by its executive board.<sup>3,4</sup> Many hospitals in and outside of the United States have adopted this parameter in its present form, or in a slightly modified form. These parameters are used by neurologists as the guidelines for declaration of brain death.

**Eelco F. M. Wijdicks, M.D.**  
Professor of Neurology  
Department of Neurology  
Mayo Clinic  
Rochester, Minnesota  
wijd@mayo.edu

Anesthesiology  
2000; 92:1204  
© 2000 American Society of Anesthesiologists, Inc.  
Lippincott Williams & Wilkins, Inc.

## Can Brain Death Testing Be Perfect?

*To the Editor:*—I appreciated the excellent review of brain death by Van Norman.<sup>1</sup> However, I must take issue with the implication that well-conducted testing will always correctly indicate whether a patient is dead or alive. As with all complex algorithms, any test sequence for the diagnosis of irreversible brain death may have hidden pitfalls, just as all software of any significant complexity will manifest occasional “bugs.” If we accept the notion that, as with all medical tests, testing for brain death has an associated sensitivity and specificity, we must also accept the notion that type I and type II testing errors will inevitably occur. This view is also supported by occasional reports of clinical conditions mimicking brain death.<sup>2,3</sup> Finally, if one accepts the notion that still-living but impaired brain stem nuclei may sometimes recover to a degree, it is possible that some nuclei will wax and wane in function during the test period.

I am curious about what should be done with patients with zero prognosis for survival, but who still do not meet all brain death criteria because some small patch of neurons continues to survive. In most of these cases there is no hope of survival, life support is withdrawn, and somatic death follows promptly. I would suggest, however, that some persons—including myself—would be willing to allow organ retrieval to be performed in such a setting (*i.e.*, a setting of “near-complete” brain death) rather than have the organs go to waste. But if I were to

## References

1. Van Norman GA: A matter of life and death: What every anesthesiologist should know about the medical, legal, and ethical aspects of declaring brain death. *ANESTHESIOLOGY* 1999; 91:275–87
2. Youngner SJ, Landefeld CS, Coulton CJ, Juknialis BW, Leary M: Brain death in organ retrieval. *JAMA* 1989; 261(15):2205–10
3. Wijdicks EFM: Determining brain death in adults. *Neurology* 1995; 45:1003–11
4. Quality Standards Subcommittee of the American Academy of Neurology: Practice parameters for determining brain death in adults (summary statement). *Neurology* 1995; 45:1012–4

(Accepted for publication November 18, 1999.)

construct my living will to allow organ harvesting in this situation, would it be honored?

**D. John Doyle, M.D., Ph.D.**  
Department of Anesthesia  
Toronto General Hospital  
University of Toronto  
Toronto, Ontario  
djdoyle@home.com

## References

1. Van Norman GA: A matter of life and death: What every anesthesiologist should know about the medical, legal, and ethical aspects of declaring brain death. *ANESTHESIOLOGY* 1999; 91:275–87
2. Bakshi N, Maselli RA, Gospe SM Jr, Ellis WG, McDonald C, Maulder RN: Fulminant demyelinating neuropathy mimicking cerebral death. *Muscle Nerve* 1997; 20:1595–7
3. Coad NR, Byrne AJ: Guillain-Barre syndrome mimicking brain-stem death. *Anaesthesia* 1990; 45:456–7

(Accepted for publication November 18, 1999.)
